# Supplementary material
Source: Springer Nature journal article supplement (https://www.springermedizin.de/resource/supplementary/12913_2013_3389_MOESM2_ESM.pdf/9532612)

**A** Mean cumulative cost of mCRPC by type of medication (Current model)

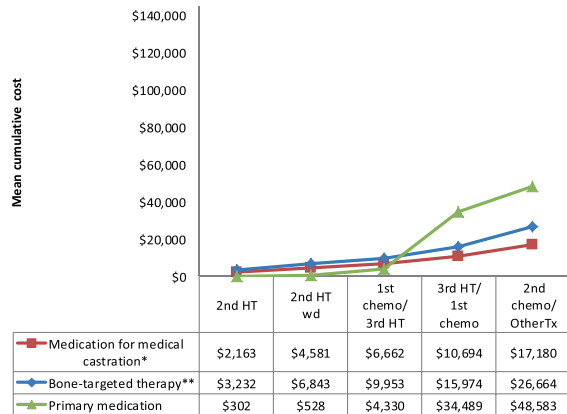

**B** Mean cumulative cost of mCRPC by type of medication (Alternate model)

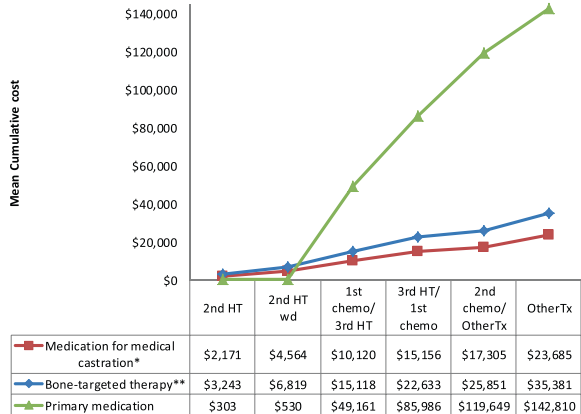

Supplement: MOESM2 [file 9532612]
